# Supplementary material
Source: publisher figshare collection journal article supplement (https://acs.figshare.com/ndownloader/files/28060535)
Supplement: Supplementary file 1 [file 28060535]

## Supporting Information

for the article

### Reemerging aspartic protease targets: Examining *C. neoformans* Major aspartyl peptidase 1 as a target for antifungal drug discovery

*Robin Kryštofek<sup>1</sup>, Pavel Šácha<sup>1</sup>, Jana Starková<sup>1</sup>, Jiří Brynda<sup>1,2</sup>, Martin Hradilek<sup>1</sup>, Eva Tloušťová<sup>1</sup>, Justyna Grzyska<sup>3</sup>, Wioletta Rut<sup>3</sup>, Michael J. Boucher<sup>4</sup>, Marcin Drąg<sup>3</sup>, Pavel Majer<sup>1</sup>, Miroslav Hájek<sup>1</sup>, Pavlína Řezáčová<sup>1,2</sup>, Hiten D. Madhani<sup>4,5</sup>, Charles S. Craik<sup>6</sup>, Jan Konvalinka<sup>1,\*</sup>*

<sup>1</sup> Institute of Organic Chemistry and Biochemistry of the Czech Academy of Sciences, Flemingovo n. 2, 16610, Prague 6, Czech Republic

<sup>2</sup> Institute of Molecular Genetics of the Czech Academy of Sciences, Vídeňská 1083, Prague 4, 14220, Czech Republic

<sup>3</sup>Department of Chemical Biology and Bioimaging, Wrocław University of Science and Technology, Wybrzeże Wyspiańskiego 27, 50-370, Wrocław, Poland

<sup>4</sup> Department of Biochemistry & Biophysics, University of California, San Francisco, San Francisco, CA 94158, USA

<sup>5</sup> Chan-Zuckerberg Biohub, San Francisco, CA 94158, USA

<sup>6</sup> Department of Pharmaceutical Chemistry, University of California San Francisco, UCSF Genentech Hall Box 2280, 600 16th St Rm S512, 94158, San Francisco, California, United States of America

## Table of contents

|                                |     |
|--------------------------------|-----|
| Chemical syntheses .....       | S2  |
| Table S1.....                  | S3  |
| Table S2.....                  | S4  |
| Figure S1 .....                | S5  |
| Figure S2 .....                | S7  |
| Figure S3 .....                | S8  |
| Figure S4 .....                | S9  |
| Figure S5 .....                | S11 |
| Figure S6 .....                | S12 |
| Supplementary references ..... | S14 |

## Chemical syntheses

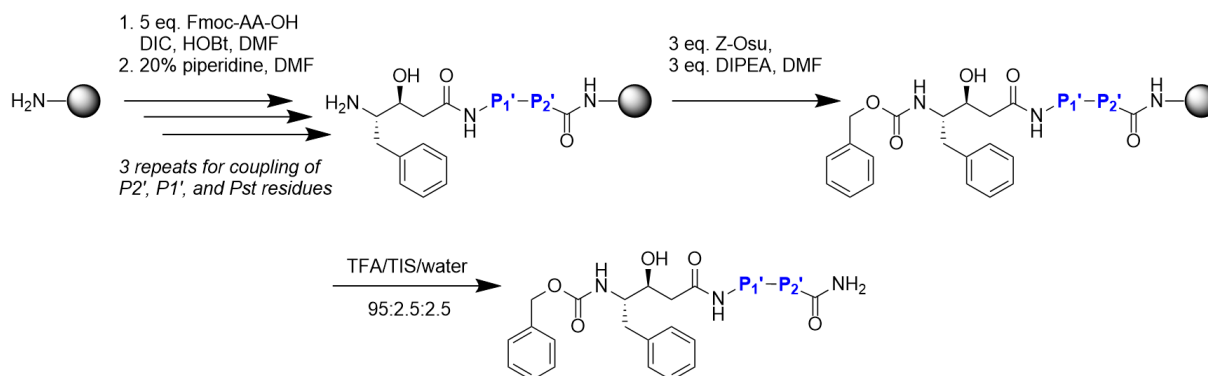

|            | cap | TSA | P1' | P2'       |                         | cap        | TSA | P1' | P2' |           |                         |
|------------|-----|-----|-----|-----------|-------------------------|------------|-----|-----|-----|-----------|-------------------------|
| <b>1a</b>  | Z   | -   | Pst | - L-Glu - | L-Abu - NH <sub>2</sub> | <b>1b</b>  | Z   | -   | Pst | - L-Gln - | L-Abu - NH <sub>2</sub> |
| <b>2a</b>  | Z   | -   | Pst | - L-Glu - | L-Nva - NH <sub>2</sub> | <b>2b</b>  | Z   | -   | Pst | - L-Gln - | L-Nva - NH <sub>2</sub> |
| <b>3a</b>  | Z   | -   | Pst | - L-Glu - | L-Val - NH <sub>2</sub> | <b>3b</b>  | Z   | -   | Pst | - L-Gln - | L-Val - NH <sub>2</sub> |
| <b>4a</b>  | Z   | -   | Pst | - L-Glu - | L-Nle - NH <sub>2</sub> | <b>4b</b>  | Z   | -   | Pst | - L-Gln - | L-Nle - NH <sub>2</sub> |
| <b>5a</b>  | Z   | -   | Pst | - L-Glu - | L-Leu - NH <sub>2</sub> | <b>6b</b>  | Z   | -   | Pst | - L-Gln - | L-Ile - NH <sub>2</sub> |
| <b>6a</b>  | Z   | -   | Pst | - L-Glu - | L-Ile - NH <sub>2</sub> | <b>7b</b>  | Z   | -   | Pst | - L-Gln - | L-Thr - NH <sub>2</sub> |
| <b>7a</b>  | Z   | -   | Pst | - L-Glu - | L-Thr - NH <sub>2</sub> | <b>8b</b>  | Z   | -   | Pst | - L-Gln - | L-Met - NH <sub>2</sub> |
| <b>8a</b>  | Z   | -   | Pst | - L-Glu - | L-Met - NH <sub>2</sub> | <b>10b</b> | Z   | -   | Pst | - L-Gln - | L-Cha - NH <sub>2</sub> |
| <b>9a</b>  | Z   | -   | Pst | - L-Glu - | L-Trp - NH <sub>2</sub> | <b>11b</b> | Z   | -   | Pst | - L-Gln - | L-Phg - NH <sub>2</sub> |
| <b>10a</b> | Z   | -   | Pst | - L-Glu - | L-Cha - NH <sub>2</sub> | <b>12b</b> | Z   | -   | Pst | - L-Gln - | L-Phe - NH <sub>2</sub> |
| <b>11a</b> | Z   | -   | Pst | - L-Glu - | L-Phg - NH <sub>2</sub> | <b>13b</b> | Z   | -   | Pst | - L-Gln - | L-Hph - NH <sub>2</sub> |
| <b>12a</b> | Z   | -   | Pst | - L-Glu - | L-Phe - NH <sub>2</sub> |            |     |     |     |           |                         |
| <b>13a</b> | Z   | -   | Pst | - L-Glu - | L-Hph - NH <sub>2</sub> |            |     |     |     |           |                         |

Fmoc-protected amino acids, Fmoc-(3S,4S)-AHPPA-OH (phenylstatine, Pst) transition state analogue (TSA) building block, and Rink amide MBHA resin were purchased from Iris Biotech (Marktredwitz, Germany) and Bachem (Bubendorf, Switzerland). N-(benzyloxycarbonyl)succinimide (Z-Osu) from Merck (Kenilworth, USA). Compounds were synthesized by standard Fmoc-chemistry solid phase peptide synthetic protocols on Rink amide MBHA resin support (subst. 0.69 mmol/g) in N,N-dimethylformamide (DMF) as a solvent. Syntheses were performed in 0.1 mmol scale, couplings with 5 equivalent amino acid excess to resin and 1-hydroxybenzotriazol (HOBt, 1.5 eq. to amino acid) and N,N'-diisopropylcarbodiimide (DIC, 1.5 eq. to amino acid) activation. Fmoc groups were removed with 20% piperidine. Coupling and deprotection as repeated to incorporate 3 residues for each compound. The N-(benzyloxycarbonyl) capping group was introduced with N-(benzyloxycarbonyl)succinimide (Z-Osu, 3 eq. to resin) in presence of N,N-diisopropylethylamine (DIPEA, 3 eq. to resin) in DMF as a solvent. Resin was then washed with dichloromethane and dried in vacuo. Compounds were deprotected and cleaved off the resin by incubation with a mixture of TFA/triisopropylsilane/water (95:2.5:2.5) for an hour.

**Table S1.** Data collection and refinement statistics.

|                                                              | Apo-MayI               | MayI-pepstatin A     |
|--------------------------------------------------------------|------------------------|----------------------|
| <b>Crystal data</b>                                          |                        |                      |
| Space group                                                  | C222 <sub>1</sub>      | C222 <sub>1</sub>    |
| a, b, c (Å)                                                  | 97.42, 112.06, 91.21   | 97.36 112.64 91.03   |
| α, β, γ (°)                                                  | 90.00, 90.00, 90.00    | 90.00, 90.00, 90.00  |
| Molecules per asymmetric unit                                | 1                      | 1                    |
| Matthews coefficient (Å <sup>3</sup> Da <sup>-1</sup> )      | 3.38                   | 3.33                 |
| Solvent content (%)                                          | 63.62                  | 63.06                |
| Max. resolution (Å)                                          | 1.75                   | 1.80                 |
| <b>Data collection and processing</b>                        |                        |                      |
| Wavelength (Å)                                               | 0.918                  | 1.542                |
| Resolution limits (Å)                                        | 48.71-1.75 (1.86-1.75) | 50.0-1.8 (1.91-1.80) |
| No. of observed reflections                                  | 264,390 (23,308)       | 138,736 (2,791)      |
| No. of unique reflections                                    | 48515 (6,330)          | 39317 (2,229)        |
| Multiplicity                                                 | 5.4 (3.7)              | 3.5 (1.3)            |
| R <sub>merge</sub> <sup>[a]</sup>                            | 0.135 (1.356)          | 0.087 (0.565)        |
| CC <sub>1/2</sub> <sup>[b]</sup>                             | 0.997 (0.482)          | 0.997 (0.590)        |
| Completeness (%)                                             | 95.8 (78.2)            | 84.3 (29.8)          |
| <I/σI>                                                       | 10.3 (1.0)             | 11.7 (0.99)          |
| <b>Refinement statistics</b>                                 |                        |                      |
| Resolution (Å)                                               | 48.7-1.75 (1.80-1.75)  | 73.7-1.8 (1.85-1.80) |
| No. of reflections in working set                            | 46,413 (2,589)         | 39,317 (2,229)       |
| No. of reflections in test set                               | 2101 (118)             | 1710 (30)            |
| R <sub>work</sub> <sup>[c]</sup> (%)                         | 18.0 (39.5)            | 17.7 (44.5)          |
| R <sub>free</sub> <sup>[d]</sup> (%)                         | 22.3 (39.3)            | 20.7 (42.9)          |
| Average B-factor (Å <sup>2</sup> )                           | 29.6                   | 24.6                 |
| RMSD bond length (Å)                                         | 0.013                  | 0.012                |
| RMSD angle (°)                                               | 1.6                    | 1.6                  |
| Number of atoms in AU<br>(protein/inhibitor/water molecules) | 2642/0/346             | 2617/60/314          |
| <b>Ramachandran plot</b>                                     |                        |                      |
| Most favored regions <sup>[e]</sup> (%)                      | 97.99                  | 97.65                |
| Additional allowed regions <sup>[e]</sup> (%)                | 2.01                   | 2.08                 |
| Disallowed regions <sup>[e]</sup> (%)                        | 0.0                    | 0.27                 |
| PDB code                                                     | 6R5H                   | 6R6A                 |

Values in parentheses report the values in the highest resolution shell.

<sup>[a]</sup>  $R_{\text{merge}} = \sum_{\text{hkl}} \sum_i |I_i(\text{hkl}) - \langle I(\text{hkl}) \rangle| / \sum_{\text{hkl}} \sum_i I_i(\text{hkl})$ .

<sup>[b]</sup> CC<sub>(1/2)</sub> is the correlation coefficient between random half data sets and from its value the Pearson correlation

$$CC^* = \sqrt{2 \frac{CC_1}{1} + \frac{CC_1}{2}} \quad S^1.$$

coefficient of the true level of signal can be calculated:

<sup>[c]</sup> R-value =  $|F_o| - |F_c| / |F_o|$ , where  $F_o$  and  $F_c$  are the observed and calculated structure factors, respectively.

<sup>[d]</sup> R<sub>free</sub> is equivalent to the R-value but is calculated for 5% of the reflections chosen at random and omitted from the refinement process <sup>S2</sup>.

<sup>[e]</sup> As determined by MolProbity <sup>S3</sup>.

**Table S2.** Cytotoxicity of Z-Pst-*L*-Glu-Hph-NH<sub>2</sub> toward various human cell lines. Data were obtained through measurements of cell viability by luminometric CellTiter-Glo® 2.0 Cell Viability Assay (Promega).

|                  | HeLa         | CCRF-CEM     | HL-60        | MCF-7        | HepG2        |
|------------------|--------------|--------------|--------------|--------------|--------------|
| CC <sub>50</sub> | > 80 $\mu$ M |

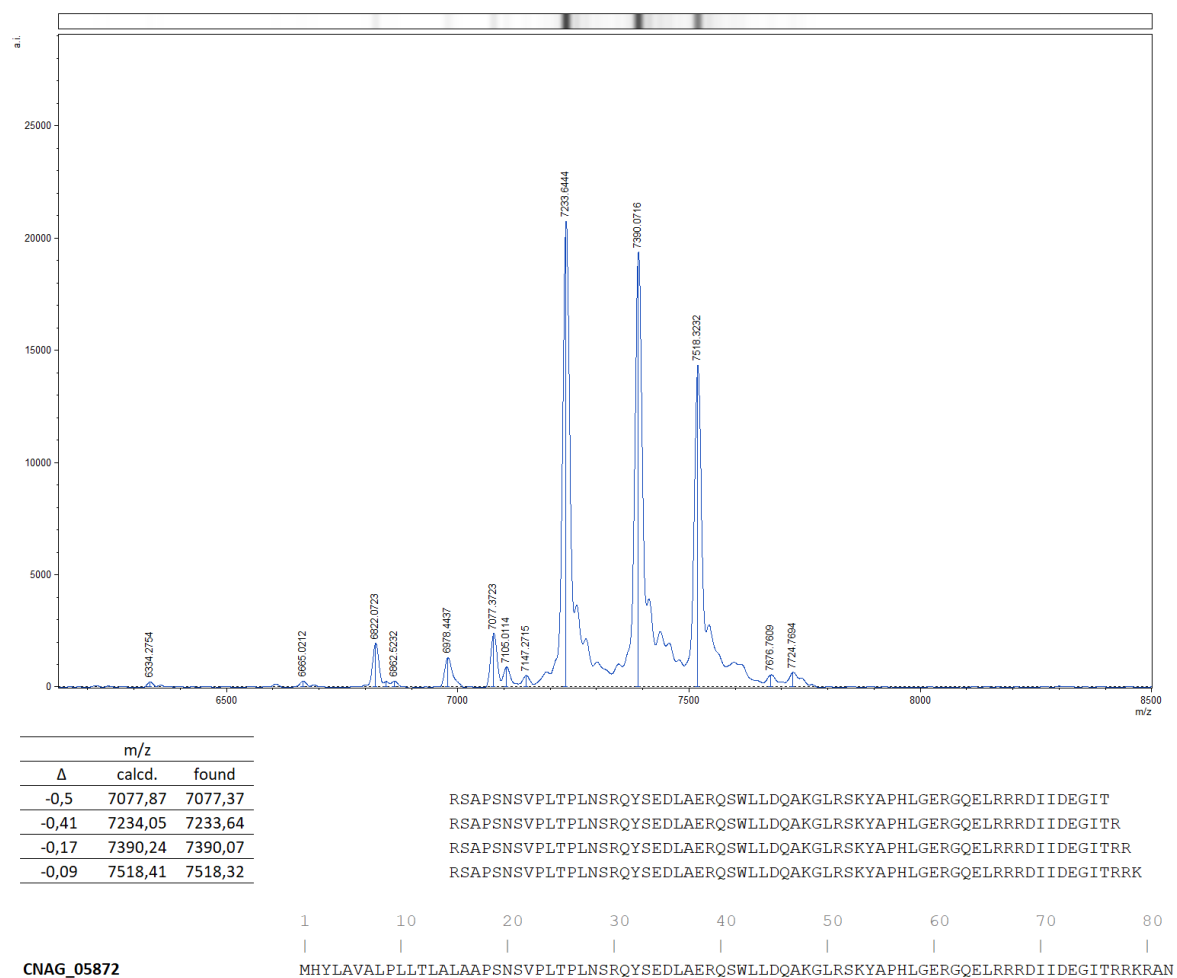

**Figure S1a.** MALDI mass spectrometry analysis of May1 prodomain fragments. The mismatching N-terminal Arg-Ser dipeptide in the fragments is a remnant of the *Bg*/II restriction site product.

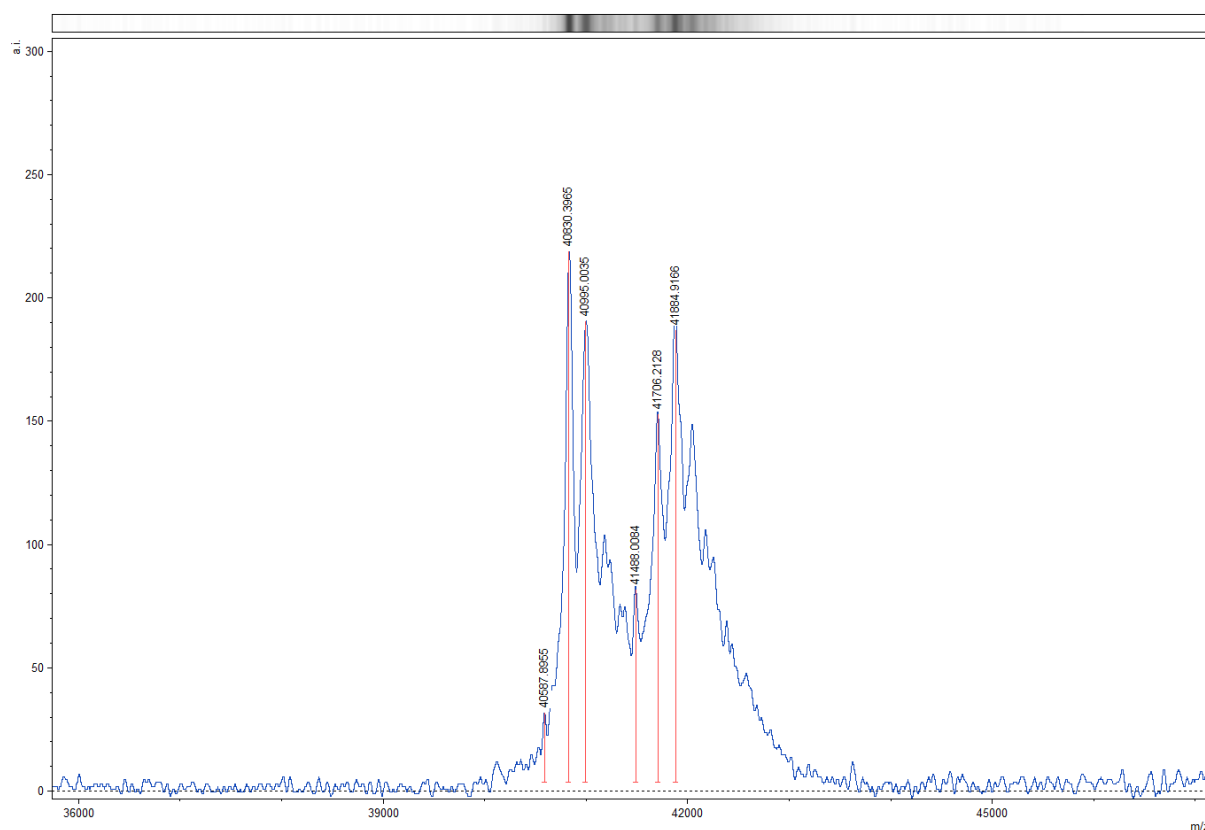

**Figure S1b.** (continued) MALDI mass spectrometry analysis of active MayI with its prodomain cleaved off. Largest possible average molecular weight of MayI fragment 77-434, including C-terminal tag and its biotinylation, is 40145.35 Da – this corresponds to the loss of the shortest detected prodomain fragment 15-76 (first entry in the table above).

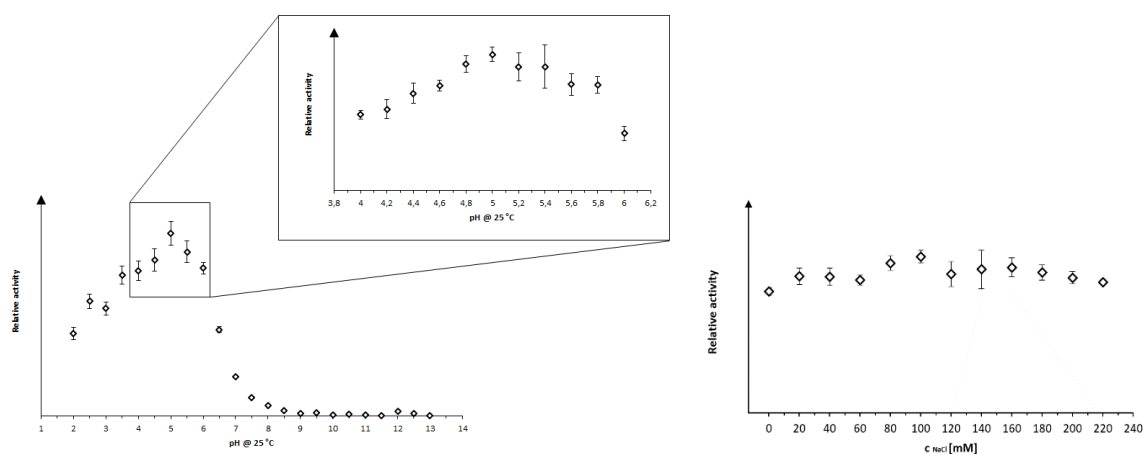

**Figure S2.** Activity profiles of May1 detected by cleavage of IQ-2 fluorescent substrate. Left side: Activity profile across pH 2.0 to 13.0 with steps of 0.5 in a Britton-Robinson buffer system. The activity maximum was further resolved with a series of buffers of pH 4.0 to 6.0 with steps of 0.2. Right side: Activity profile with varying salt concentration at pH 5.0.

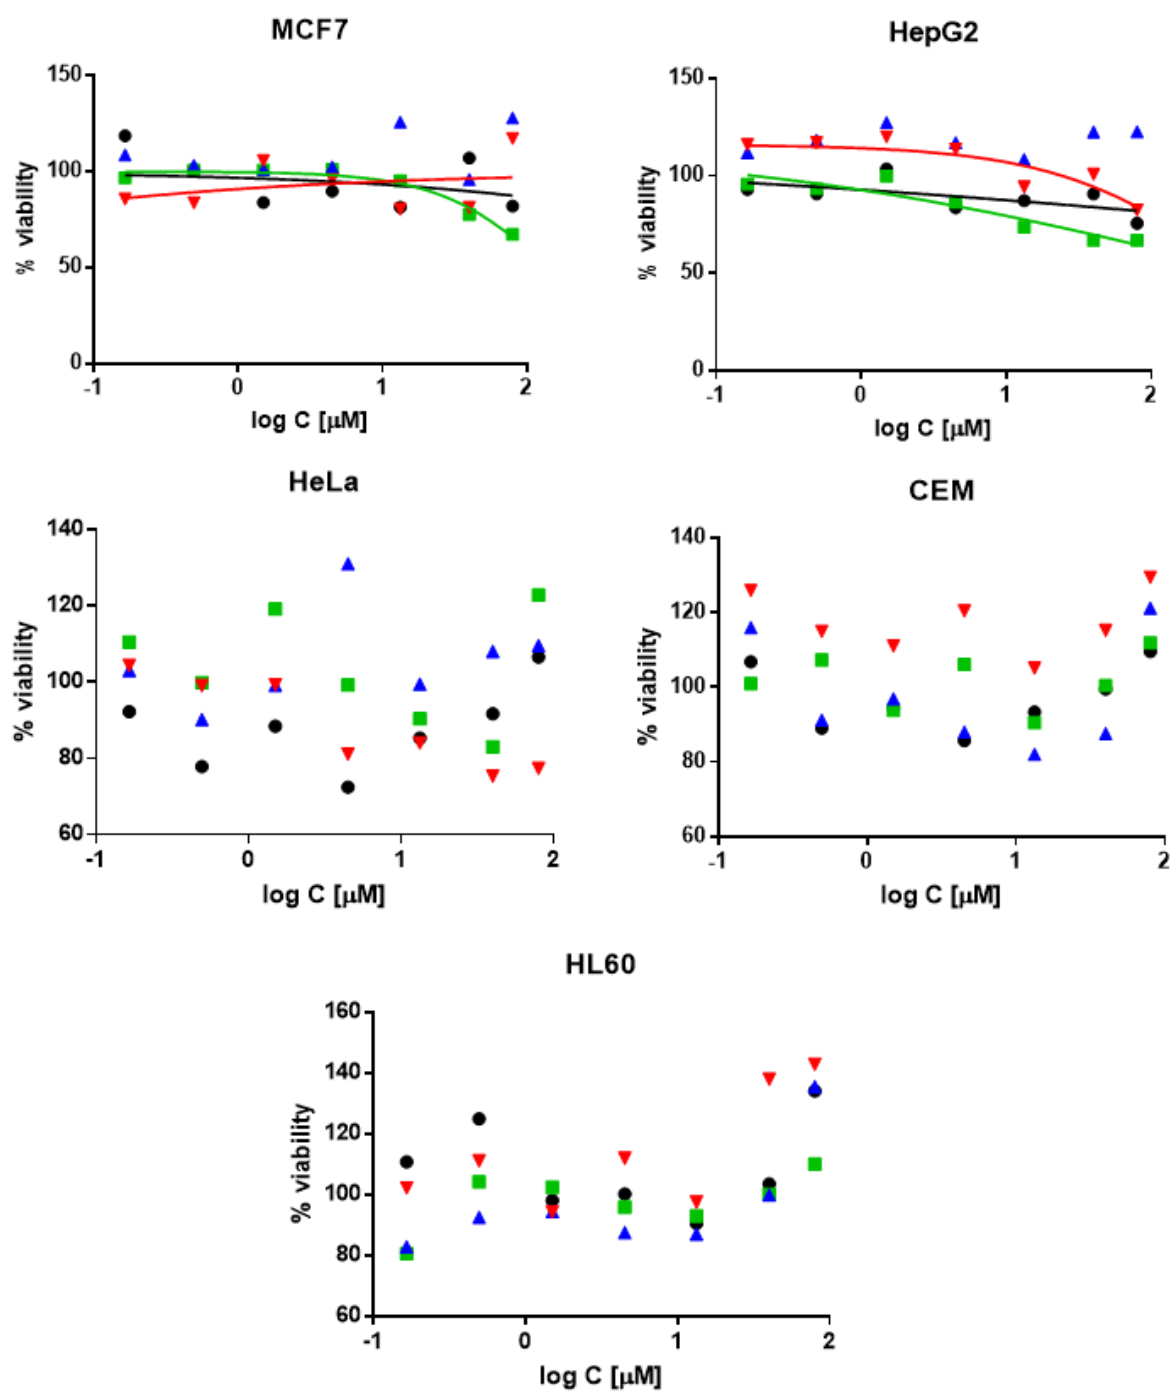

**Figure S3.** Cytotoxicity curves for five cell lines. Data were obtained through measurements of cell viability by luminometric CellTiter-Glo® 2.0 Cell Viability Assay (Promega).



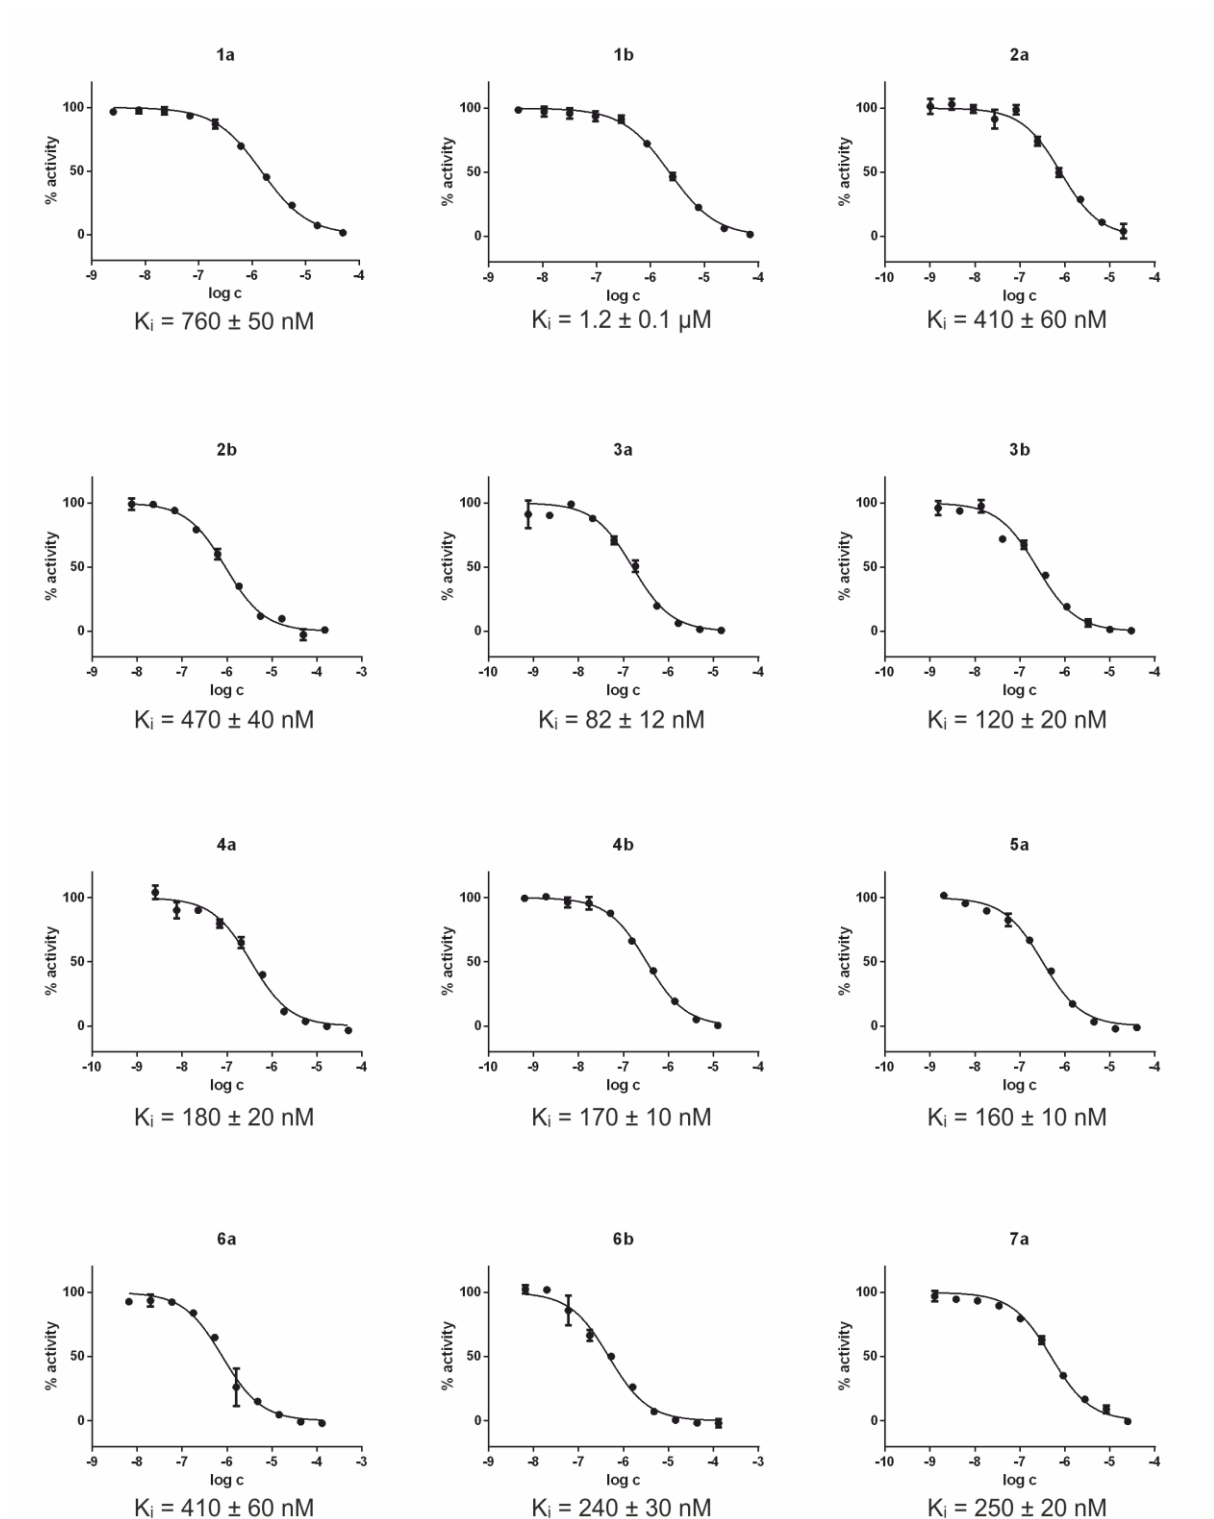

**Figure S4a.** May1 inhibition curves for compounds 1 – 13a and 1 – 13b with fitted  $K_i$  values and 95% CI. Figure continues on the next page.

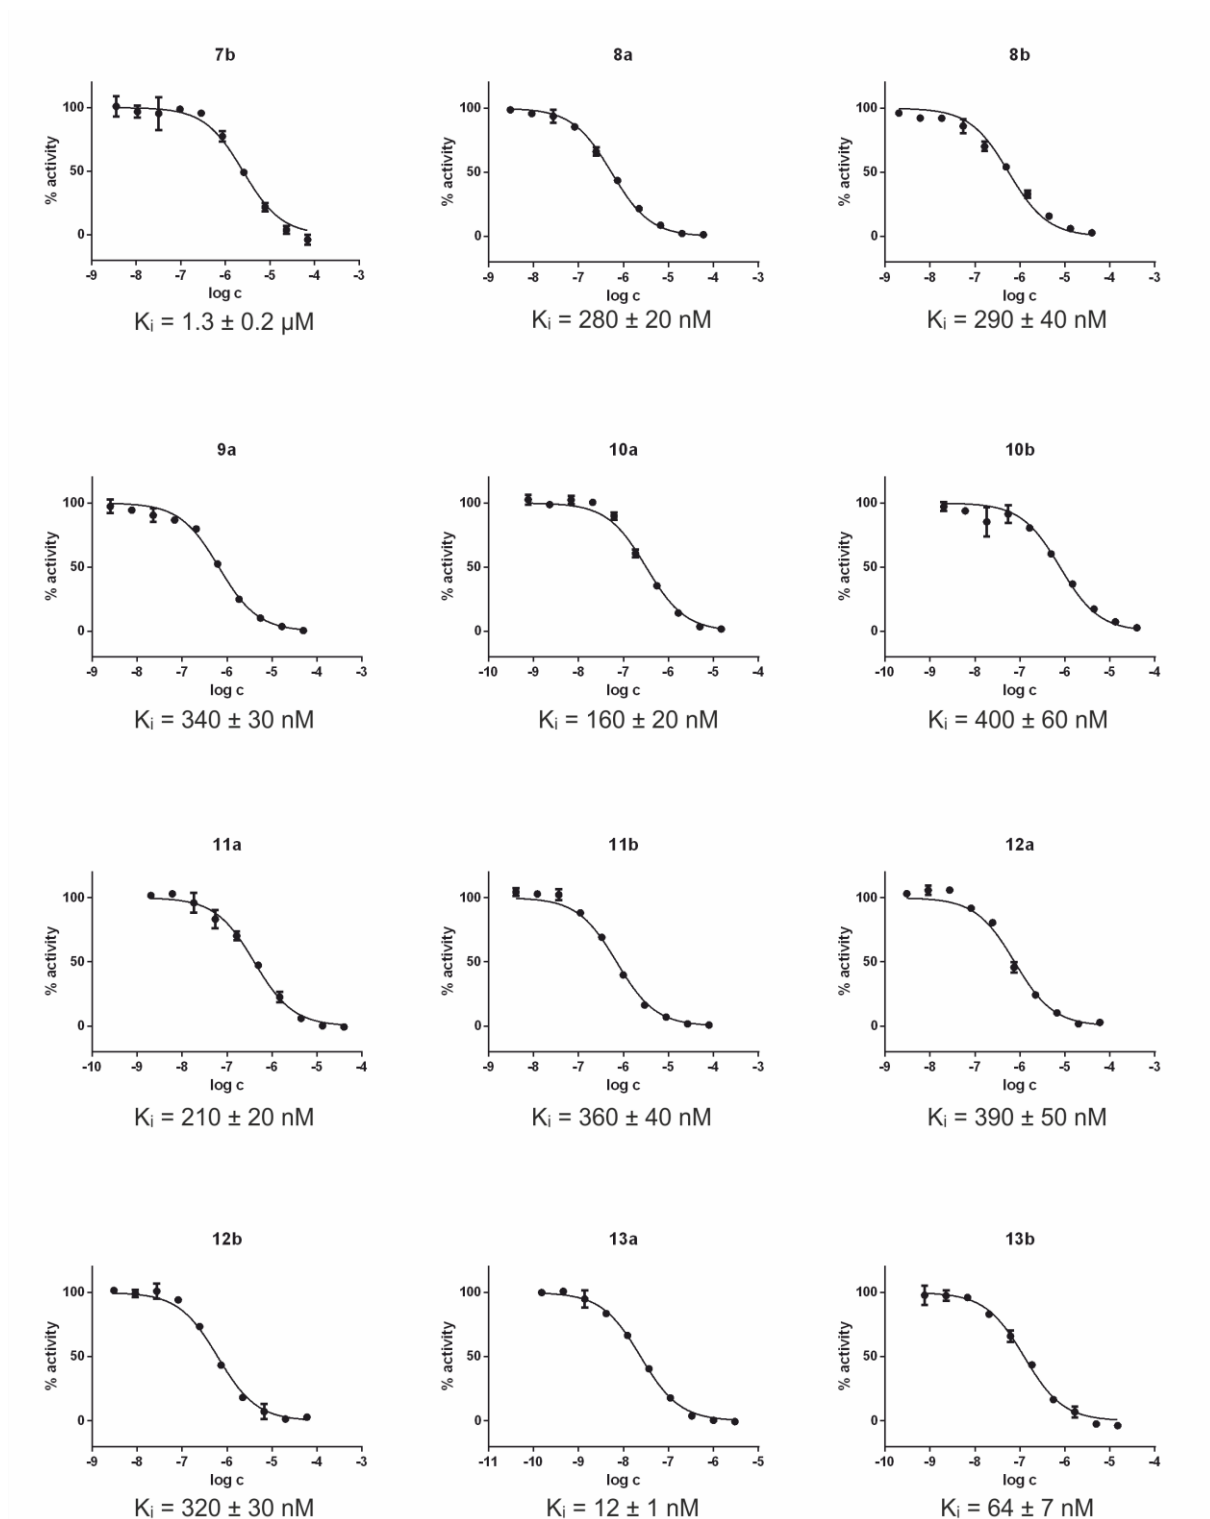

**Figure S4b.** (continued) May1 inhibition curves for compounds 1 – 13a and 1 – 13b with fitted  $K_i$  values and 95% CI.

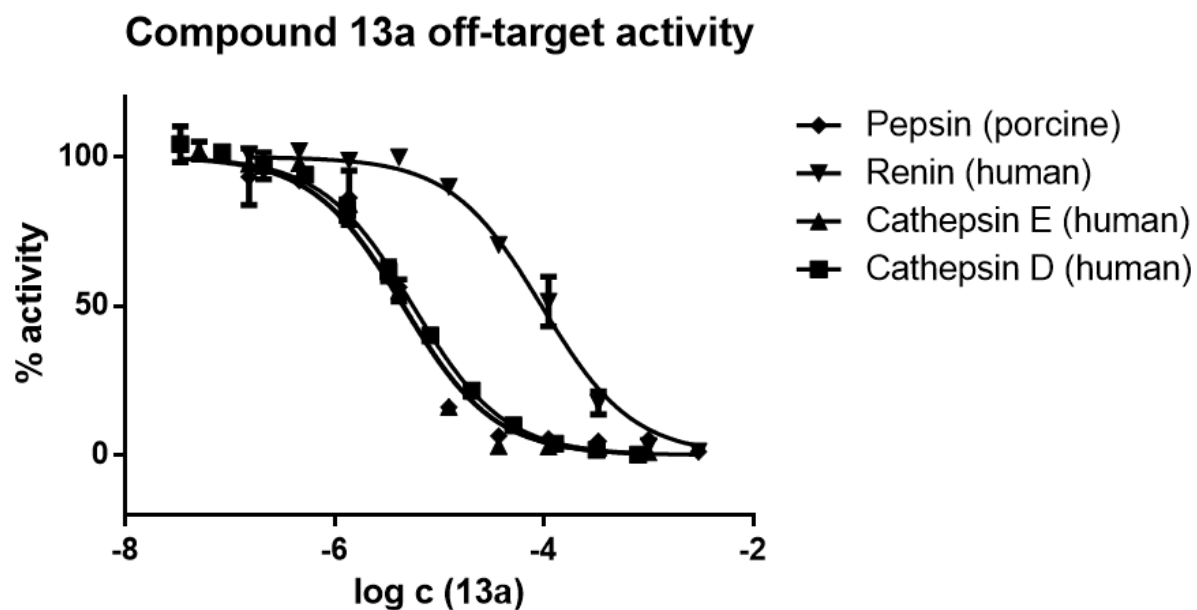

**Figure S5.** Inhibition curves for compound 13a against a panel of aspartic protease off-targets. Bottom table details the assay conditions used to calculate the fitted  $K_i$  values and 95% CI.

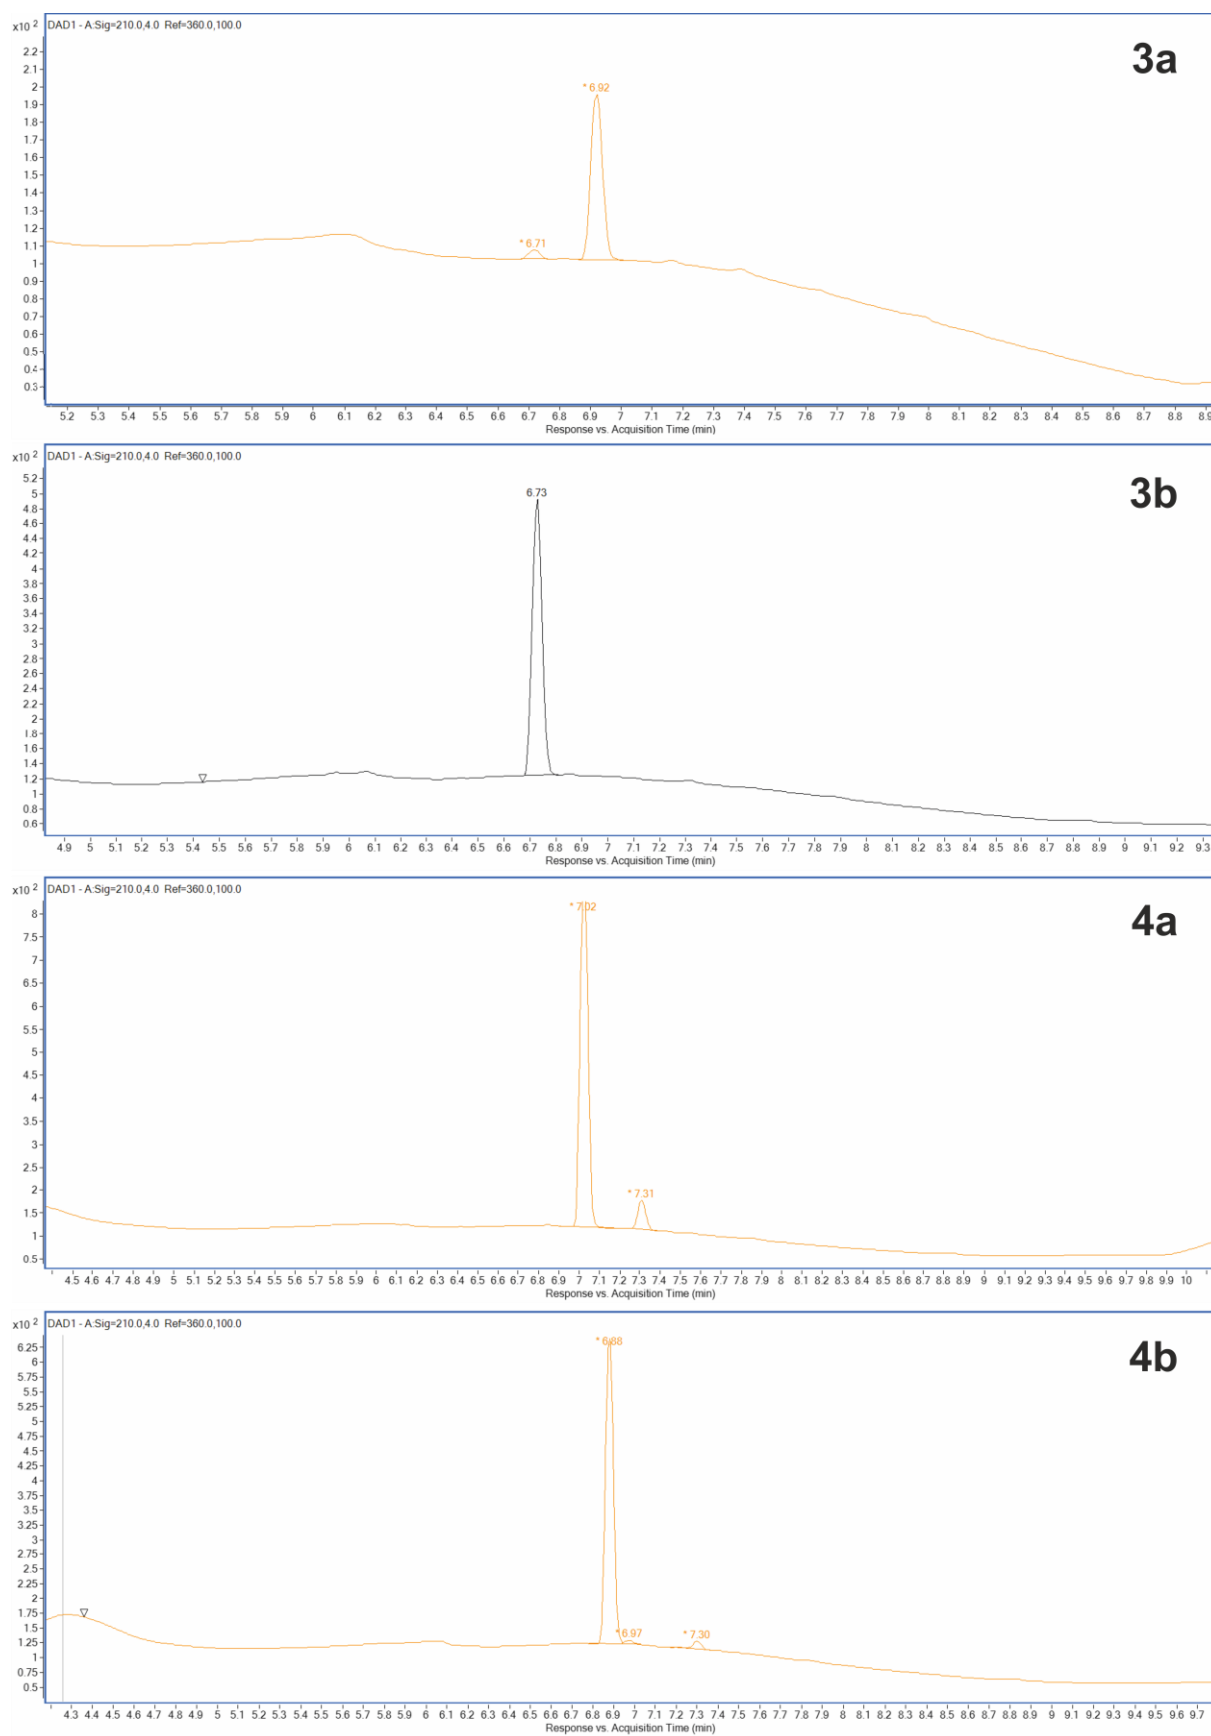

**Figure S6a.** LC traces of compounds 3a, 3b, 4a and 4b. Figure continues on the next page.

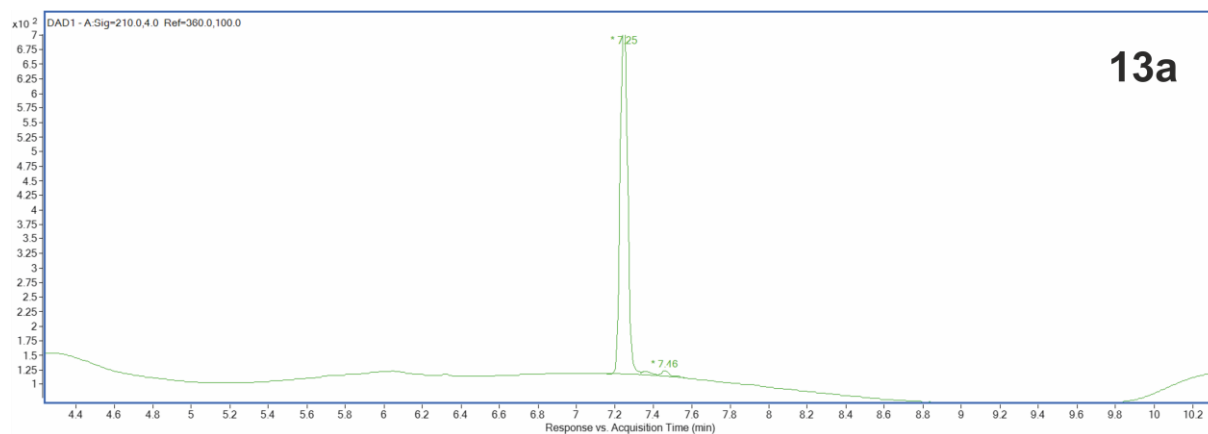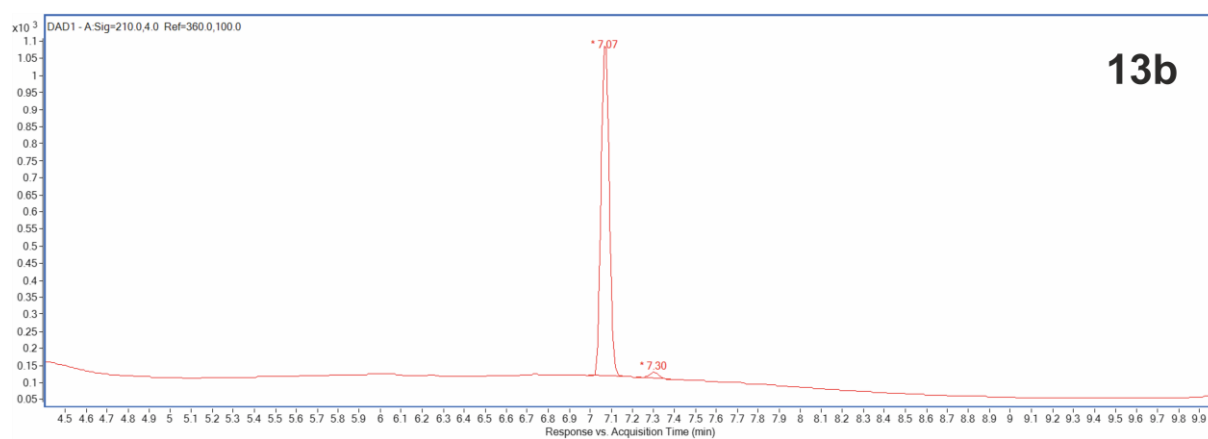

**Figure S6b.** (continued) LC traces of compounds 13a and 13b.

**Supplementary references:**

- S1 Karplus, P. A. & Diederichs, K. Linking crystallographic model and data quality. *Science* **336**, 1030-1033 (2012).
- S2 Brunger, A. T. Free R value: a novel statistical quantity for assessing the accuracy of crystal structures. *Nature* **355**, 472-475 (1992).
- S3 Chen, V. B. *et al.* MolProbity: all-atom structure validation for macromolecular crystallography. *Acta Cryst D* **66**, 12-21, (2010).
